# Supplementary material
Source: Springer Nature journal article supplement (https://www.springermedizin.de/resource/supplementary/12935_2010_300_MOESM2_ESM.pdf/9540258)

## Percentage of chromosome gain/loss

-15.0 -12.0 -9.0 -6.0 -3.0 0.0 3.0 6.0 9.0 12.0 15.0 18.0 21.0 24.0

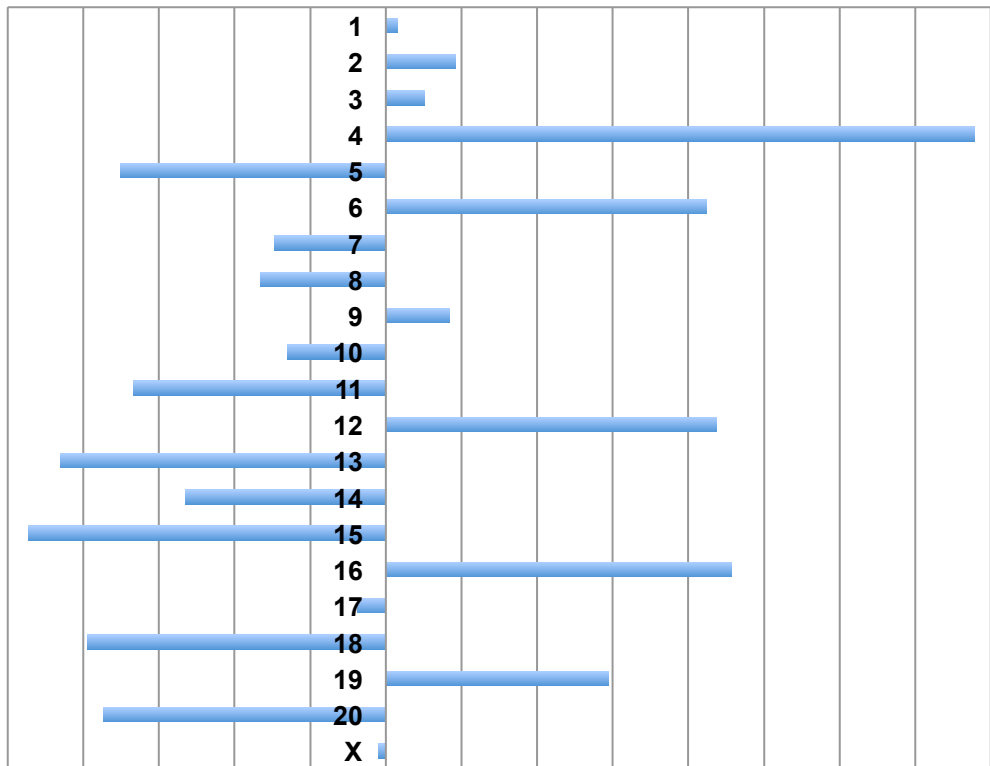

Supplement: MOESM2 [file 9540258]
